# Supplementary material for: Clinically relevant molecular subtypes and genomic alteration-independent differentiation in gynecologic carcinosarcoma
Source: PubMed Central journal article supplement (PMC6823358; doi:10.1038/s41467-019-12985-x), 2019-10-31
Supplement: 41467_2019_12985_MOESM3_ESM.pdf [file 41467_2019_12985_MOESM3_ESM.pdf]

## **Description of Additional Supplementary Files**

File Name: Supplementary Data 1

Description: Sample Information for Histology and Genomic Aberration Subtype.

File Name: Supplementary Data 2

Description: Samples and Analytical Methods.

File Name: Supplementary Data 3

Description: Source of Matched Normal Samples.

File Name: Supplementary Data 4

Description: Genes in the Target Panel.

File Name: Supplementary Data 5

Description: The Mutant Allele Frequency of SNVs/indels in 596 Genes in the Panel for Selectively Sampled Carcinoma and Sarcoma Elements from 14 Cases.

File Name: Supplementary Data 6

Description: The Copy Number of CNVs in 596 Genes in the Panel for Selectively Sampled Carcinoma and Sarcoma Elements from 14 Cases.
